# Supplementary material for: Bulk and Surface Chemical Composition of Wheat Flour Particles of Different Sizes
Source: Hindawi journal article supplement (doi:10.1155/2019/5101684), 2019-04-22
Supplement: f1 [file 5101684.f1.doc]

**Supplementary data**

**Distribution of Chemical Composition in Wheat Flour Particles of Different Size**

Jiangtao Lin[[1]](#footnote-2),2*, Yujuan Gu1, Ke Bian1*

(1College of Food Science and Technology, Henan University of Technology, Zhengzhou, 450001, China; 2 Henan Agricultural University, Zhengzhou, 450001, China)


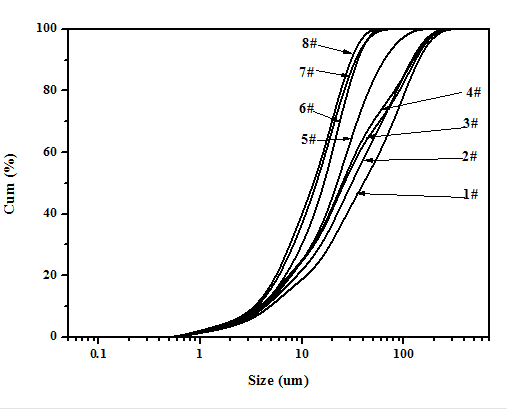

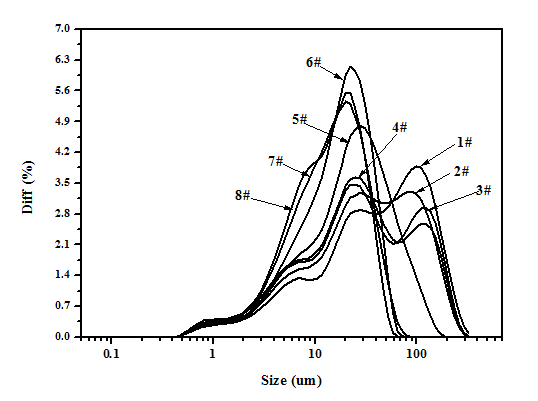


1. **(B)**

Fig S1. Particle size distribution of different flour sample with the cumulative particle size distribution (A) and interval distribution (B).

Fig S1 was the two distribution regular forms of flour particles of different size. A was the cumulative distribution, which represented the percentage of particles smaller or larger than a certain particle size. B was the interval distribution, which represented the percentage of particles in a certain particle size interval. Both the two graphs were used to support the particle size distribution of the 8 flour samples (part 3.1) and the data in Table 1.

**



**

**(A)** **(B)**

**



**

**(C)** **(D)**

Fig S2. Distribution trend of amino acids in flour particles of different size.

Fig S2 represented the variation trend of amino acids in flour particles of different size. The amino acids which had the same distribution trend were classified into one group. According to their distribution trend in eight samples, the amino acids were divided into four groups: I, Asp, Arg, Gly, [Ile](javascript:;), Lys, and Thr (A); II, Met, Cys, Ala, Tyr, His, Val, Ser, Phe, and Leu (B); III, Pro (C); and IV, Glu (D). Fig S2 was used to support the amino acids composition and distribution in the 8 flour samples (part 3.5).







**(A)** **(B)**

**

**



**(C)** **(D)**







1. **(F)**

Fig S3. Correlation between function groups content by surface composition analysis and the corresponding amino acid in bulk composition analysis. A, the sum of Tyr, Try, Ser and Thr and peak2 of C1s; B, the sum of Asp and Glu and Peak 3 of C1s, Peak1 of O1s and Peak3 of O1s; C, Lys and peak 2 of N1s; D, the sum of His and Arg and Peak 1 of N1s; E, the sum of Cys and Met and Peak 2 of S2p; F, the sum of Tyr, Try, Ser, Thr ,Asp, Glu, Gln, Asp, His and Arg and the Peak 2of C1s, Peak 3 of C1s, Peak 1 of O1s, Peak 3 of O1s and Peak 1 of N1s.

Fig S3 was the linear regression diagram based on the relationship between functional groups afforded by surface XPS analysis (table 4) and corresponding amino acids in bulk composition analysis (table 2), which was used to investigate the relationship between bulk chemical composition and surface chemical composition of flour particle of different size (part 3.7).

1. *The corresponding author: Jiangtao Lin, E-mail: hautlin@126.com; Tel/Fax: 086-371-67758022;

   or Ke Bian, E-mail: kebian@163.com; Tel/Fax: 086-371-67756658. [↑](#footnote-ref-2)
